# Supplementary material for: The anti-aging effects of Renshen Guben on thyrotoxicosis mice: Improving immunosenescence, hypoproteinemia, lipotoxicity, and intestinal flora
Source: Front Immunol. 2022 Oct 25;13:983501. doi: 10.3389/fimmu.2022.983501 (PMC9640368; doi:10.3389/fimmu.2022.983501)
Supplement: Supplementary file 3 [file Table_3.xlsx]

## Sheet: Sheet1
ID	m/z	Retention time (min)	Ion mode	Metabolites	Compound ID	Super Class	Class	Sub Class	level	kegg	Score	Fragmentation Score	Adducts	Formula	Mass Error (ppm)	VIP	P-value	adj.P-value	log2(FC)	FC	average(L)	average(V)	L1	L2	L3	L4	L5	L6	V1	V2	V3	V4	V5	V6
0.72_112.0867m/z	112.087	0.7158	pos	Histamine	HMDB0000870	Organic nitrogen compounds	Organonitrogen compounds	Amines	**	C00388	50.7	62.3	M+H	C5H9N3	-2.13163	4.27424	0.0386862	0.614387	-2.85553	0.138166	47830.3	346180	21584.4	41369.7	54800.8	86096.8	29197	53933.1	319431	667363	778057	136731	61169.3	114329
1.55_203.1381m/z	203.138	1.54748	pos	Leucyl-Alanine	HMDB0028922	Organic acids and derivatives	Carboxylic acids and derivatives	Amino acids, peptides, and analogues			44	28.1	M+H	C9H18N2O3	-4.62295	5.63092	0.00377439	0.26729	-1.08283	0.472102	373719	791606	67503.8	388507	360298	349960	469292	606752	894320	719768	1.09541e+06	769164	466938	804042
5.14_300.1346m/z	300.135	5.13918	neg	Tryptophyl-Proline	HMDB0029091	Organic acids and derivatives	Carboxylic acids and derivatives	Amino acids, peptides, and analogues			40.3	35.3	M-H	C16H19N3O3	-2.4294	1.86566	0.00318901	0.248879	-1.01542	0.494683	40740.3	82356.4	12097.5	48570.7	67916.2	39137.3	38487	38233.1	110915	85341.2	56074.7	71355.7	74971.5	95480.7
4.47_276.1332m/z	276.133	4.46955	pos	Tryptophyl-Alanine	HMDB0029076	Organic acids and derivatives	Carboxylic acids and derivatives	Amino acids, peptides, and analogues			48.1	50	M+H	C14H17N3O3	-3.79855	1.57318	0.0472347	0.644666	-0.943214	0.520073	48595.9	93440.6	2160.72	37901.9	44917.7	24030.4	58314.1	124251	109014	68249.1	91659.3	107428	60447.2	123846
0.88_173.0913m/z	173.091	0.882	pos	Glycylproline	HMDB0000721	Organic acids and derivatives	Carboxylic acids and derivatives	Amino acids, peptides, and analogues			49.3	54.9	M+H	C7H12N2O3	-4.37296	4.00621	0.00107909	0.161333	-0.879855	0.543422	226005	415892	234249	270458	220790	266192	201146	163196	521166	437826	386524	262457	385472	501910
0.87_203.1017m/z	203.102	0.868133	pos	Serylproline	HMDB0029047	Organic acids and derivatives	Carboxylic acids and derivatives	Amino acids, peptides, and analogues			47.8	48.8	M+H	C8H14N2O4	-4.80534	4.22292	0.00364627	0.262394	-0.812761	0.569291	284349	499480	100176	375701	353130	209915	320328	346846	446267	590302	581328	490630	355168	533183
5.58_352.1642m/z	352.164	5.57938	pos	Tryptophyl-Phenylalanine	HMDB0029090	Organic acids and derivatives	Carboxylic acids and derivatives	Amino acids, peptides, and analogues			46	38	M+H	C20H21N3O3	-3.77831	1.54849	0.025037	0.544506	-0.777515	0.583371	54366.6	93193.8	9559.18	71345.8	34330.2	34300.1	80013.7	96650.5	115563	82592.2	86354.8	99354.5	77176.8	98121.3
4.39_266.1254n	267.133	4.38545	pos	Threoninyl-Phenylalanine	HMDB0029068	Organic acids and derivatives	Carboxylic acids and derivatives	Amino acids, peptides, and analogues			52.2	69.6	M+H, M+NH4, M+H-H2O	C13H18N2O4	-4.56245	4.55083	0.0262106	0.553072	-0.757288	0.591608	460459	778319	91411.9	363361	543393	481308	529033	754250	838047	731214	1.05075e+06	869550	443265	737084
1.71_203.1382m/z	203.138	1.71437	pos	Isoleucyl-Alanine	HMDB0028900	Organic acids and derivatives	Carboxylic acids and derivatives	Amino acids, peptides, and analogues			40.7	18.8	M+H	C9H18N2O3	-4.2099	4.23256	0.0452591	0.637682	-0.729028	0.60331	499800	828430	44460.8	669133	442790	311519	664840	866060	808843	681048	1.1825e+06	893111	709894	695185
4.94_261.1241m/z	261.124	4.9355	neg	Prolylphenylalanine	HMDB0011179	Organic acids and derivatives	Carboxylic acids and derivatives	Amino acids, peptides, and analogues			42.8	19.7	M-H	C14H18N2O3	-1.33505	3.1471	0.00696764	0.353501	-0.711907	0.610512	205155	336037	46841.2	258175	239268	164423	259248	262975	328353	318758	406708	344225	285998	332184
5.43_316.1658m/z	316.166	5.4267	neg	Leucyl-Tryptophan	HMDB0028940	Organic acids and derivatives	Carboxylic acids and derivatives	Amino acids, peptides, and analogues			45.9	37.2	M-H	C17H23N3O3	-2.69838	1.5558	0.0351218	0.593952	-0.697342	0.616707	60008.7	97305	3215.99	67071.6	54510.6	50408.8	83629	101216	118282	98170.6	106020	93216.7	68289.3	99851.5
5.43_318.1800m/z	318.18	5.43433	pos	Isoleucyl-Tryptophan	HMDB0028918	Organic acids and derivatives	Carboxylic acids and derivatives	Amino acids, peptides, and analogues			54.4	80.6	M+H	C17H23N3O3	-3.84127	4.14242	0.0201586	0.502179	-0.663411	0.631384	424630	672538	52237	495544	459030	366345	503750	670871	779069	650165	705015	674758	553810	672413
4.87_263.1382m/z	263.138	4.86933	pos	Phenylalanylproline	HMDB0011177	Organic acids and derivatives	Carboxylic acids and derivatives	Amino acids, peptides, and analogues			46.9	40.9	M+H	C14H18N2O3	-3.29143	9.98104	0.0242259	0.539335	-0.596767	0.661234	2.90741e+06	4.39694e+06	690450	3.50357e+06	4.30516e+06	2.11331e+06	3.16728e+06	3.66467e+06	3.91348e+06	3.99281e+06	5.04453e+06	4.77062e+06	4.36728e+06	4.29293e+06
4.43_229.1536m/z	229.154	4.42725	pos	Isoleucylproline	HMDB0011174	Organic acids and derivatives	Carboxylic acids and derivatives	Amino acids, peptides, and analogues			49.1	63.2	M+H	C11H20N2O3	-4.4816	10.9094	0.0319521	0.585099	-0.583801	0.667204	3.70844e+06	5.55818e+06	771874	4.56043e+06	5.34721e+06	2.65612e+06	4.1523e+06	4.7627e+06	4.73429e+06	5.39301e+06	6.5214e+06	5.81961e+06	5.86797e+06	5.01282e+06
4.43_227.1392m/z	227.139	4.42523	neg	Leucylproline	HMDB0011175	Organic acids and derivatives	Carboxylic acids and derivatives	Amino acids, peptides, and analogues			46.7	40.5	M-H	C11H20N2O3	-4.22199	3.8382	0.0438363	0.633941	-0.577783	0.669993	503744	751864	97076.7	670960	571018	368418	669830	645159	642945	681517	990901	760670	778018	657136
1.23_187.1069m/z	187.107	1.22828	pos	6-Hydroxydopamine	HMDB0001537	Benzenoids	Phenols	Benzenediols			39.8	8	M+NH4	C8H11NO3	-4.76569	4.45	0.0137896	0.455808	-0.739246	0.599052	412607	688766	90215.3	610429	480073	262182	539769	492973	600257	715143	892349	689184	569942	665723
11.23_277.1439m/z	277.144	11.2312	neg	Monoethylhexyl phthalic acid	HMDB0013248	Benzenoids	Benzene and substituted derivatives	Benzoic acids and derivatives		C03343	47.1	41	M-H	C16H22O4	-2.30775	2.94501	0.00619093	0.333503	-2.10753	0.232044	36072.3	155454	63714.8	34742.9	40785.8	25227.7	20309	31653.5	150441	99477.6	82001.2	147888	137063	315855
1.27_337.0435m/z	337.044	1.26622	neg	Imidazoleacetic acid ribotide	HMDB0006032	Organic oxygen compounds	Organooxygen compounds	Carbohydrates and carbohydrate conjugates	**	C04437	46.6	39.3	M-H	C10H15N2O9P	-2.18252	3.09544	0.00846843	0.381062	-1.32461	0.399256	90850.6	227550	116592	43173.4	128453	82189.5	52950.8	121744	211859	227650	75102.6	196866	299298	354521
12.69_306.2775m/z	306.278	12.6883	pos	Octadecanamide	HMDB0034146	Organic acids and derivatives	Carboximidic acids and derivatives	Carboximidic acids	*	C13846	38.3	0	M+Na	C18H37NO	2.87448	1.04504	0.0439705	0.633975	-1.90058	0.267836	6234.71	23278.1	9387.96	2567.28	6903.33	13223.2	2063.19	3263.31	44853.2	28236.4	3554.74	23500.7	1885.19	37638
0.95_112.9996m/z	113	0.951233	pos	Propionic acid	HMDB0000237	Organic acids and derivatives	Carboxylic acids and derivatives	Carboxylic acids	**	C00163	38.2	0	M+K	C3H6O2	-4.37913	1.66168	0.0118354	0.429397	-1.74737	0.297844	14679.4	49285.5	16204.9	10808.6	9357.68	34363	14599.2	2743	62467.2	83965.8	28708	41313.7	15279.7	63978.5
0.81_146.1169m/z	146.117	0.812717	pos	Cyclohexanecarboxylic acid	HMDB0031342	Organic acids and derivatives	Carboxylic acids and derivatives	Carboxylic acids	**	C09822	46.9	42.1	M+NH4	C7H12O2	-4.89538	4.73963	0.0239149	0.535661	-0.591837	0.663498	691080	1.04157e+06	973150	662342	673312	859369	562171	416136	956243	1.47222e+06	817545	867591	1.2182e+06	917623
4.39_272.1780n	295.164	4.38545	pos	17a-Estradiol	HMDB0000429	Lipids and lipid-like molecules	Steroids and steroid derivatives	Estrane steroids	**	C02537	38.7	0	M+H, M+Na	C18H24O2	1.33027	4.79298	0.00682186	0.352022	-1.03423	0.488275	291000	595976	47973.3	256016	346446	285851	323522	486193	653876	556366	789454	609052	294265	672845
4.89_263.1394m/z	263.139	4.89067	neg	(2E)-N-(4-aminobutyl)-3-(4-hydroxy-3-methoxyphenyl)prop-2-enimidic acid	HMDB0139553	Phenylpropanoids and polyketides	Cinnamic acids and derivatives	Hydroxycinnamic acids and derivatives	**	C10497	44.7	31.2	M-H	C14H20N2O3	-2.75875	2.1599	0.0290988	0.569086	-0.9663	0.511817	73298.5	143212	7017.36	63795.3	25791.4	88643.7	105035	149508	141069	149894	173935	149351	63537.1	181486
4.98_218.1048n	257.068	4.98197	pos	N-Acetylserotonin	HMDB0001238	Organoheterocyclic compounds	Indoles and derivatives	Hydroxyindoles	**	C00978	43.2	24.6	M+H, M+K	C12H14N2O2	-3.53782	2.21023	0.0120772	0.431871	-2.25407	0.209631	16456.6	78502.6	8369.06	1203.8	20246.3	49151	4788.2	14981.3	57766.1	84186	43133.4	49437.8	67698.7	168793
0.95_565.0466m/z	565.047	0.949683	neg	Uridine diphosphate glucose	HMDB0000286	Nucleosides, nucleotides, and analogues	Pyrimidine nucleotides	Pyrimidine nucleotide sugars	**	C00029	38.5	0	M-H	C15H24N2O17P2	-1.98117	3.8797	0.00169281	0.189931	-2.69756	0.154153	33780.5	219135	60153.4	14080.9	22571.5	19513.5	5307.29	81056.3	220543	402218	213879	95005.7	158704	224462
0.95_606.0733m/z	606.073	0.949683	neg	Uridine diphosphate-N-acetylglucosamine	HMDB0000290	Nucleosides, nucleotides, and analogues	Pyrimidine nucleotides	Pyrimidine nucleotide sugars	**	C00043	38.5	0	M-H	C17H27N3O17P2	-1.65652	3.72186	0.00904469	0.390289	-1.99608	0.25068	62323.7	248619	127829	18471.5	32046.5	57987.7	3080.09	134528	210425	446919	246287	118290	121161	348631
1.21_323.0279m/z	323.028	1.21073	neg	Uridine 5'-monophosphate	HMDB0000288	Nucleosides, nucleotides, and analogues	Pyrimidine nucleotides	Pyrimidine ribonucleotides	**	C00105	38.1	0	M-H	C9H13N2O9P	-2.23687	1.04152	6.97718e-05	0.110386	-1.84375	0.278596	4815.53	17285	6655.77	7929.7	2406.32	4804.02	1514.13	5583.24	18803	23580.4	15069.3	18403.3	11725.4	16128.3
0.79_276.1542m/z	276.154	0.785033	pos	Glutamyllysine	HMDB0004207	Organic acids and derivatives	Carboxylic acids and derivatives	Amino acids, peptides, and analogues			47.5	48.7	M+H	C11H21N3O5	-4.28105	2.37087	0.0280433	0.562044	0.676278	1.59801	239189	149679	234563	197296	181190	226648	344879	250561	135915	160442	148831	263820	79232.5	109836
0.85_380.0759m/z	380.076	0.8524	neg	S-Formylglutathione	HMDB0001550	Organic acids and derivatives	Carboxylic acids and derivatives	Amino acids, peptides, and analogues	**	C01031	36.7	0	M+FA-H	C11H17N3O7S	-3.09496	1.96617	0.000629323	0.145593	6.78096	109.969	50062.7	455.242	52368.9	7022.67	46945.2	82904.7	49537.8	61596.8	2182.91	548.538	2.54837e-07	2.54837e-07	2.54837e-07	2.54837e-07
8.50_313.2144m/z	313.214	8.49553	pos	4-Androstenediol	HMDB0005849	Lipids and lipid-like molecules	Steroids and steroid derivatives	Androstane steroids		C14210	55.7	83.8	M+Na	C19H30O2	2.19392	2.25263	0.0278298	0.561561	0.997578	1.99665	181205	90754.8	106625	198339	154504	290998	148299	188466	24067	39873.3	130126	168261	128322	53879.7
5.25_288.2080n	289.215	5.25212	pos	Androstanedione	HMDB0000899	Lipids and lipid-like molecules	Steroids and steroid derivatives	Androstane steroids	**	C00674	37.7	0	M+H-H2O, M+H	C19H28O2	-3.20797	1.33641	0.00147384	0.175564	1.95565	3.87889	30565.2	7879.88	28306.4	18333.6	29817.6	34048	42099.3	30786.3	267.587	5942.07	23200.7	2.54837e-07	17868.9	2.54837e-07
11.03_392.2919n	391.285	11.0315	neg	Chenodeoxycholic acid	HMDB0000518	Lipids and lipid-like molecules	Steroids and steroid derivatives	Bile acids, alcohols and derivatives	**	C02528	49.3	55.2	M-H, M+FA-H, 2M-H	C24H40O4	-1.96312	18.0646	0.0320714	0.585406	0.610999	1.52732	1.63691e+07	1.07176e+07	1.5772e+07	1.33942e+07	1.30975e+07	2.33631e+07	1.14491e+07	2.11389e+07	7.57602e+06	7.23585e+06	1.2014e+07	1.34522e+07	1.05244e+07	1.3503e+07
10.39_437.2900m/z	437.29	10.3855	neg	Hyodeoxycholic acid	HMDB0000733	Lipids and lipid-like molecules	Steroids and steroid derivatives	Bile acids, alcohols and derivatives	*		48.5	45.9	M+FA-H	C24H40O4	-2.2695	4.99699	0.0188055	0.496136	0.866556	1.8233	821707	450669	604856	614022	861658	831951	795155	1.2226e+06	199444	281709	393191	823166	634391	372114
10.39_375.2875m/z	375.288	10.3901	pos	Deoxycholic acid	HMDB0000626	Lipids and lipid-like molecules	Steroids and steroid derivatives	Bile acids, alcohols and derivatives	**	C04483	53.3	76.2	M+H-H2O	C24H40O4	-4.75602	6.12718	0.0156462	0.470528	0.867413	1.82439	1.20361e+06	659732	1.27027e+06	717586	1.17448e+06	1.67294e+06	844022	1.54235e+06	402267	379965	664060	1.02945e+06	899001	583650
10.39_392.2919n	391.285	10.3855	neg	Ursodeoxycholic acid	HMDB0000946	Lipids and lipid-like molecules	Steroids and steroid derivatives	Bile acids, alcohols and derivatives		C07880	41.4	13.4	M-H, 2M-H	C24H40O4	-1.8443	6.73555	0.0155446	0.469011	0.939627	1.91803	1.43007e+06	745593	1.07792e+06	896481	1.60306e+06	1.80146e+06	1.15475e+06	2.04676e+06	378948	406335	750324	1.237e+06	1.08841e+06	612540
8.50_390.2752n	373.272	8.49553	pos	Nutriacholic acid	HMDB0000467	Lipids and lipid-like molecules	Steroids and steroid derivatives	Bile acids, alcohols and derivatives	*		54.9	83.6	M+H-H2O, M+H	C24H38O4	-4.7422	48.411	0.0177326	0.490276	0.954456	1.93785	8.17401e+07	4.21808e+07	5.79717e+07	8.09568e+07	7.49171e+07	1.30074e+08	6.58183e+07	8.07024e+07	1.25335e+07	2.70973e+07	5.35357e+07	7.08978e+07	6.14224e+07	2.75983e+07
11.63_457.3291m/z	457.329	11.6342	pos	3a,7a,12a-Trihydroxy-5b-cholestan-26-al	HMDB0003533	Lipids and lipid-like molecules	Steroids and steroid derivatives	Bile acids, alcohols and derivatives	**	C01301	51.4	61.3	M+Na	C27H46O4	0.718612	3.44751	0.0180612	0.493456	0.962257	1.94836	416063	213545	273197	413291	232305	518822	489375	569386	46624.1	258554	385206	179379	212716	198795
7.25_464.3006m/z	464.301	7.25325	neg	Glycocholic acid	HMDB0000138	Lipids and lipid-like molecules	Steroids and steroid derivatives	Bile acids, alcohols and derivatives	**	C01921	45.5	36.7	M-H	C26H43NO6	-2.52056	1.25856	0.0340376	0.591571	1.13893	2.20218	51914.7	23574.3	14287.5	81008.8	57197.7	46660.7	40626.5	71707.2	8686.03	6817.48	41593.7	38592.9	30337.2	15418.2
10.07_375.2876m/z	375.288	10.071	pos	Isodeoxycholic acid	HMDB0002536	Lipids and lipid-like molecules	Steroids and steroid derivatives	Bile acids, alcohols and derivatives	*	C17661	51.4	69.7	M+H-H2O	C24H40O4	-4.51667	5.51253	0.0450547	0.637624	1.1603	2.23504	892837	399472	1.36186e+06	1.38066e+06	244889	1.15288e+06	563303	653426	130452	246968	823656	454074	399252	342429
9.60_406.2711n	451.269	9.59803	neg	7-Ketodeoxycholic acid	HMDB0000391	Lipids and lipid-like molecules	Steroids and steroid derivatives	Bile acids, alcohols and derivatives	*		53.9	73.8	M+FA-H, 2M-H	C24H38O5	-2.14003	18.1154	0.0078469	0.368406	1.20738	2.30919	8.24743e+06	3.57158e+06	1.02911e+07	4.96196e+06	7.03477e+06	1.3647e+07	6.23e+06	7.31974e+06	2.95888e+06	1.43474e+06	3.68298e+06	3.98369e+06	5.59284e+06	3.77631e+06
9.92_437.2899m/z	437.29	9.9245	neg	Murocholic acid	HMDB0000811	Lipids and lipid-like molecules	Steroids and steroid derivatives	Bile acids, alcohols and derivatives	*	C15515	47.9	44.4	M+FA-H	C24H40O4	-2.36425	4.49201	0.0103451	0.407066	1.38203	2.60635	480700	184434	570482	579847	209743	772553	259772	491803	69879.1	148091	321815	219288	225313	122219
9.12_399.3239m/z	399.324	9.12143	pos	7 alpha,26-Dihydroxy-4-cholesten-3-one	HMDB0012459	Lipids and lipid-like molecules	Steroids and steroid derivatives	Bile acids, alcohols and derivatives	**	C17336	51.8	75.6	M+H-H2O	C27H44O3	-4.39386	1.36369	0.00402554	0.275007	1.74422	3.35015	35979.6	10739.7	21768.7	53655.1	34870	28798.1	28739.7	48046	1234.99	7019.34	21063.1	5178.76	28087	1855.08
4.35_445.0981m/z	445.098	4.34617	neg	5-(3',4',5'-Trihydroxyphenyl)-gamma-valerolactone-3'-O-glucuronide	HMDB0059984	Organic oxygen compounds	Organooxygen compounds	Carbohydrates and carbohydrate conjugates			39.5	5.12	M+FA-H	C17H20O11	-1.61459	1.32946	0.0306088	0.57887	37.1361	1.51034e+11	38489.2	2.54837e-07	1109.58	5865.87	76772	91462	22253.7	33471.8	2.54837e-07	2.54837e-07	2.54837e-07	2.54837e-07	2.54837e-07	2.54837e-07
2.17_253.0822m/z	253.082	2.17093	neg	Formyl-5-hydroxykynurenamine	HMDB0012948	Organic oxygen compounds	Organooxygen compounds	Carbonyl compounds	**	C05647	50.8	61.9	M+FA-H	C10H12N2O3	-3.9546	1.0132	0.000208298	0.129272	1.76784	3.40545	17605.8	5169.89	19105	9176.92	23400.9	20501.2	13414.8	20035.9	6086.09	5239.83	3184.69	5361.61	6176.46	4970.66
1.86_271.0454m/z	271.045	1.86063	neg	Chorismate	HMDB0012199	Organic acids and derivatives	Carboxylic acids and derivatives	Dicarboxylic acids and derivatives	**	C00251	48.4	48.7	M+FA-H	C10H10O6	-2.40031	1.52088	0.000309704	0.129492	4.14879	17.7383	32178.5	1814.07	27104.9	12386.2	35277.2	54950.4	29745.9	33606.1	2053.65	2401.59	1201.39	2419.26	1747.81	1060.74
1.55_160.0961m/z	160.096	1.54748	pos	5-Acetamidovalerate	HMDB0012175	Lipids and lipid-like molecules	Fatty Acyls	Fatty acids and conjugates	**	C03087	49.9	59.9	M+H	C7H13NO3	-4.58083	2.08769	0.0133986	0.451414	1.64347	3.12416	86808.2	27786.1	168511	30963.6	57904.1	107521	73056.3	82892.5	36333.7	34691.8	16299.8	18542.9	27623.8	33224.4
7.78_391.2122m/z	391.212	7.7774	neg	Corticosterone	HMDB0001547	Lipids and lipid-like molecules	Steroids and steroid derivatives	Hydroxysteroids	**	C02140	39.1	0	M+FA-H	C21H30O4	-1.24418	1.11545	0.000341476	0.129492	3.25761	9.56396	17887.5	1870.3	14738.4	8045.39	29238.7	20869.1	14207.7	20225.5	2443.18	351.597	1676.11	239.28	3149.03	3362.6
0.88_156.0529n	139.05	0.882	pos	4-Imidazolone-5-propionic acid	HMDB0001014	Organoheterocyclic compounds	Azoles	Imidazoles	**	C03680	52.6	75.1	M+H-H2O, M+NH4	C6H8N2O3	-4.0772	4.81919	0.00803953	0.372895	0.587296	1.50243	921019	613020	805331	875116	715299	971823	1.03372e+06	1.12483e+06	580333	596427	736396	620836	824080	320050
1.23_138.0426n	139.05	1.22828	pos	Urocanic acid	HMDB0000301	Organoheterocyclic compounds	Azoles	Imidazoles	**	C00785	43.2	25.9	M+H-H2O, M+H	C6H6N2O2	-2.15187	4.02341	0.00759935	0.365519	0.614632	1.53117	586856	383274	615933	548716	583910	502183	676056	594338	335694	373726	381422	370041	630802	207956
3.27_240.0504m/z	240.05	3.27143	neg	Leucodopachrome	HMDB0004067	Organoheterocyclic compounds	Indoles and derivatives	Indolecarboxylic acids and derivatives	**	C05604	44.5	37.5	M+FA-H	C9H9NO4	-4.74695	1.39457	0.000734208	0.145593	1.26238	2.3989	41978.2	17498.9	37608.5	27563.9	61869.1	40498	36021.8	48308.1	21347.1	14434.6	16918.7	15471.8	23551	13270.3
11.33_312.2287n	295.225	11.3272	pos	13-L-Hydroperoxylinoleic acid	HMDB0003871	Lipids and lipid-like molecules	Fatty Acyls	Lineolic acids and derivatives	**	C04717	52.2	74.8	M+H-H2O, M+H	C18H32O4	-4.49627	2.56916	0.036563	0.602904	1.34492	2.54016	145629	57330.7	304353	172842	60174.9	70229.2	127218	138957	53667.2	48295.7	80238	41249.5	62035.6	58498.1
11.33_276.2077n	277.215	11.3272	pos	Stearidonic acid	HMDB0006547	Lipids and lipid-like molecules	Fatty Acyls	Lineolic acids and derivatives	**	C16300	52	71.2	M+H-H2O, M+H	C18H28O2	-4.47916	1.98134	0.0399026	0.618293	1.56671	2.96229	80319.9	27114.2	177199	100704	26129	34805.9	71465.9	71615.6	21293.2	21997.4	39758.2	21051.7	31401	27183.4
6.16_245.1385m/z	245.139	6.15592	neg	3-Hydroxydodecanedioic acid	HMDB0000413	Organic acids and derivatives	Hydroxy acids and derivatives	Medium-chain hydroxy acids and derivatives			51.5	63.9	M-H	C12H22O5	-3.73381	2.62121	0.0497562	0.647888	0.357395	1.28111	434334	339029	559315	489212	369246	371144	413185	403902	453564	321113	324060	319104	380777	235555
5.69_435.2224m/z	435.222	5.68845	neg	3-Hydroxysebacic acid	HMDB0000350	Organic acids and derivatives	Hydroxy acids and derivatives	Medium-chain hydroxy acids and derivatives			47.2	45	2M-H	C10H18O5	-2.62763	1.72939	0.0164652	0.477623	5.99537	63.7948	55178.7	864.94	44949.8	14552.7	114098	111134	11304.3	35033.1	1796	941.606	129.045	763.735	88.7947	1470.46
7.06_391.2119m/z	391.212	7.06315	neg	21-Deoxycortisol	HMDB0004030	Lipids and lipid-like molecules	Steroids and steroid derivatives	Pregnane steroids	**	C05497	46.9	41.3	M+FA-H	C21H30O4	-2.11861	1.8349	0.00111537	0.163036	5.55796	47.1099	46799.9	993.419	40622.5	10523.4	81854.9	63148.8	32429.7	52220	808.734	876.239	930.475	648.368	1195.96	1500.74
1.41_137.0452m/z	137.045	1.4086	pos	Hypoxanthine	HMDB0000157	Organoheterocyclic compounds	Imidazopyrimidines	Purines and purine derivatives	**	C00262	42.5	23.8	M+H	C5H4N4O	-4.55239	6.28108	0.00624508	0.33449	1.78627	3.44923	775669	224882	742039	903495	187972	728744	1.35609e+06	735671	262686	69471.3	366408	138451	197635	314639
0.88_289.0672m/z	289.067	0.8802	neg	2-Keto-glutaramic acid	HMDB0001552	Organic acids and derivatives	Keto acids and derivatives	Short-chain keto acids and derivatives	**	C00940	38.4	0	2M-H	C5H7NO4	-1.97798	1.01449	0.0152635	0.465893	0.588451	1.50363	50269.3	33431.9	46550.7	63987.4	31682.8	50677.1	61938.7	46779	34289.4	24435.6	34490.1	35189.1	26081.8	46105.5
1.25_289.0669m/z	289.067	1.25235	neg	Uridine	HMDB0000296	Nucleosides, nucleotides, and analogues	Pyrimidine nucleosides	Unclassified	**	C00299	48.6	50.2	M+FA-H	C9H12N2O6	-3.41006	2.20971	0.0216973	0.513582	0.977377	1.96888	169239	85956.6	126825	274091	88276.4	195689	161648	168902	91673.8	17967.3	114364	66567.7	92092.9	133074
1.76_258.0844n	257.077	1.75648	neg	3-Methyluridine	HMDB0004813	Nucleosides, nucleotides, and analogues	Pyrimidine nucleosides	Unclassified			40.8	23.3	M-H, M+FA-H	C10H14N2O6	-3.00351	3.92645	0.0220363	0.519386	1.14172	2.20643	409442	185567	545429	691935	190567	311513	388700	328506	174841	84754.9	356822	156699	143129	197156
1.74_284.0750n	283.068	1.74187	neg	Xanthosine	HMDB0000299	Nucleosides, nucleotides, and analogues	Purine nucleosides	Unclassified	**	C01762	49.2	50.9	M-H, 2M-H	C10H12N4O6	-2.53644	4.18347	0.029622	0.572372	2.7447	6.70251	304266	45395.8	493644	476499	25854.5	102538	594915	132146	24119.4	11784.8	153494	10711.7	50188.8	22076.7
4.44_236.0556m/z	236.056	4.44142	neg	5-Phenyl-1,3-oxazinane-2,4-dione	HMDB0060400	Benzenoids	Benzene and substituted derivatives	Unclassified	**	C16596	49.1	55	M+FA-H	C10H9NO3	-4.64467	1.71837	0.000681282	0.145593	3.41319	10.653	43191.3	4054.37	47771.8	16144.7	58997.7	69296.6	26899.5	40037.3	4601.11	4487.58	3858.63	3865.4	2902.34	4611.15
10.13_400.3324n	401.339	10.133	pos	Calcidiol	HMDB0003550	Lipids and lipid-like molecules	Steroids and steroid derivatives	Vitamin D and derivatives	**	C01561	45.9	43.1	M+H-H2O, M+H	C27H44O2	-4.41539	1.66691	0.00636748	0.336623	1.03246	2.04552	85597.8	41846.6	74357.4	94561.2	49266.2	132767	90719.1	71915.8	18658.3	38708.4	50094.5	41258.2	58497.3	43862.7
